# Supplementary material for: Genetic Risk Score Predictive of the Plasma Triglyceride Response to an Omega-3 Fatty Acid Supplementation in a Mexican Population
Source: MDPI journal article supplement (doi:10.3390/nu11040737), 2019-03-29

**Supplementary material: Flowchart of genetic risk score development.**

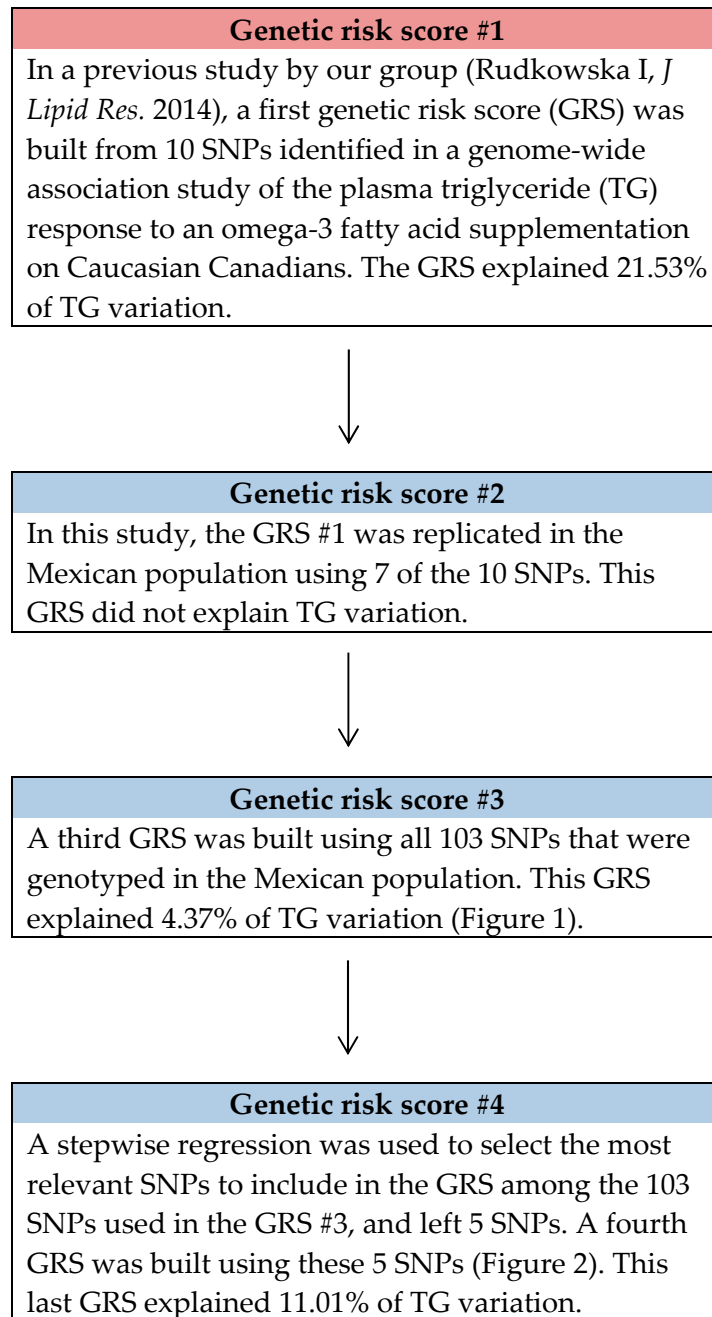

Supplement: s1 [file s1]
